# Supplementary material for: Identification of New Dystroglycan Complexes in Skeletal Muscle
Source: PubMed Central journal article supplement (PMC3738564; doi:10.1371/journal.pone.0073224), 2013-08-08
Supplement: pone.0073224.s004.pdf [file pone.0073224.s004.pdf]

**Table S1: Calcium channel proteins identified in the  $\beta$ -dystroglycan immunoprecipitation from Experiment 3 by proteomics.**

| <b>SWISSPROT ID</b> | <b>DESCRIPTION</b>                                        | <b>GENE ID</b> | <b>SCORE</b> | <b>PEP.</b> | <b>COV.</b> |
|---------------------|-----------------------------------------------------------|----------------|--------------|-------------|-------------|
| CAC1C_MOUSE         | Voltage-dependent L-type calcium channel subunit alpha-1C | Cacna1c        | 50           | 5           | 1.1         |
| CAC1E_MOUSE         | Voltage-dependent R-type calcium channel subunit alpha-1E | Cacna1e        | 43           | 2           | 1.8         |
| CACB3_MOUSE         | Voltage-dependent L-type calcium channel subunit beta-3   | Cacnb3         | 47           | 3           | 4.3         |

Score: Mascot protein confidence score; Pep: number of unique peptides identified; Cov: percent protein sequence coverage.
